# Supplementary material
Source: PubMed Central journal article supplement (PMC6338316)
Supplement: jciinsight-3-124912-s113.pdf [file jciinsight-3-124912-s113.pdf]

**Primary insulin hypersecretion in nondiabetic subjects:  
pathophysiology and clinical implications.**

**Domenico Tricò<sup>1,2</sup>, Andrea Natali<sup>1</sup>, Silva Arslanian<sup>3,4</sup>, Andrea Mari<sup>5</sup>, and Ele Ferrannini<sup>6</sup>**

<sup>1</sup> Department of Clinical and Experimental Medicine, University of Pisa, Pisa, Italy;

<sup>2</sup> Institute of Life Sciences, Sant'Anna School of Advanced Studies, Pisa, Italy;

<sup>3</sup> Center for Pediatric Research in Obesity and Metabolism, UPMC Children's Hospital of Pittsburgh, Pittsburgh, PA;

<sup>4</sup> Division of Pediatric Endocrinology, Diabetes and Metabolism, Children's Hospital of Pittsburgh, University of Pittsburgh Medical Center, Pittsburgh, PA;

<sup>5</sup> Institute of Neuroscience, National Research Council, Padua, Italy;

<sup>6</sup> Institute of Clinical Physiology, National Research Council, Pisa, Italy

**Corresponding author:**

Ele Ferrannini, MD

CNR Institute of Clinical Physiology

Via Roma 67, Pisa 56126, Italy

E-mail: ferranni@ifc.cnr.it

Telephone: +39 050 553272

Fax: +39 050 553335

**Supplemental Figure 1 – Flow chart of the adult study cohort.**

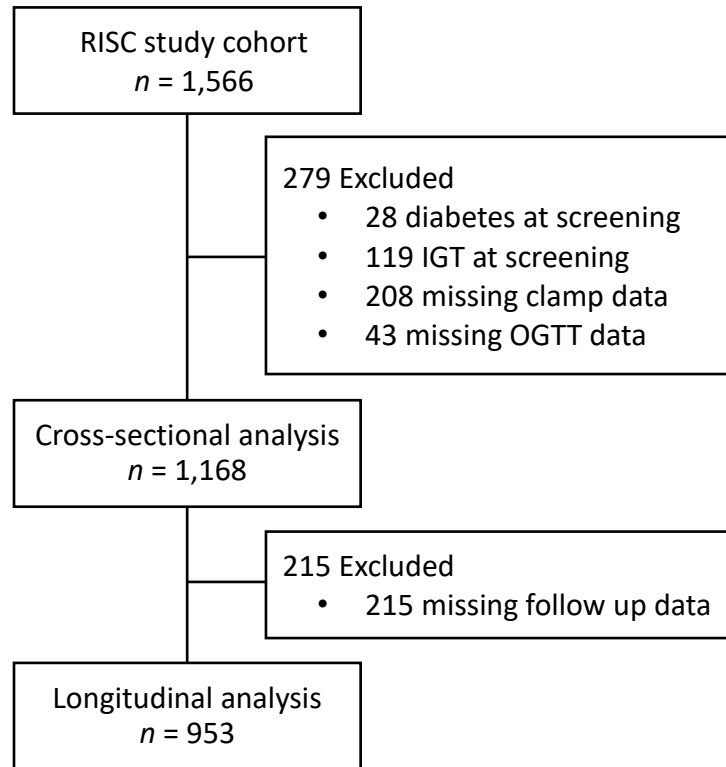

## **EGIR-RISC Study Group**

**Project Management Board:** B. Balkau, S.W. Coppack, J.M. Dekker, E. Ferrannini, A. Mari, M. Walker.

**RISC Recruiting centres:** *Amsterdam, The Netherlands:* R.J. Heine, J. Dekker, G. Nijpels, W. Boorsma. *Athens, Greece:* A. Mitrakou, S. Liatis, K. Kyriakopoulou. *Belgrade, Yugoslavia:* N. Lalic, K. Lalic, A. Jotic, L. Lukic, M. Civcic. *Dublin, Ireland:* J. Nolan, T.P. Yeow, M. Murphy, C. DeLong, G. Neary, M.P. Colgan. *Frankfurt, Germany:* T. Konrad, H. Böhles, S. Fuellert, F. Baer, H. Zuchhold. *Geneva, Switzerland:* A. Golay, V. Barthassat, V. Makoundou, T.N.O. Lehmann, E. Harsch Bobbioni, T. Merminod. *Glasgow, Scotland:* J. Petrie, C. Perry, F. Neary, C. MacDougall, K. Shields, L. Malcolm. *Kuopio, Finland:* M. Laakso, U. Salmenniemi, A. Aura, R. Raisanen, U. Ruotsalainen, T. Sistonen, M. Laitinen. *London, England:* S. Coppack, P. McIntosh, G. Hood, P. Khadobaksh. *Lyon, France:* M. Laville, A. Brac de la Perriere, C. Louche-Pelissier, C. Maitrepierre, J. Peyrat, A. Serusclat. *Madrid, Spain:* R. Gabriel, E.M. Sánchez, R. Carraro, A. Frieria, B. Novella. *Malmö, Sweden (1):* P. Nilsson, M. Persson, G. Östling, (2): O. Melander, P. Burri. *Milan, Italy:* P.M. Piatti, L.D. Monti, E. Setola, F. Minicucci, A. Colleluori. *Newcastle-upon-Tyne, England:* M. Walker, I.M. Ibrahim, D. Carman, Y. McGrady, D. L. Richardson. *Odense, Denmark:* H. Beck-Nielsen, P. Staehr, K. Hojlund, V. Jensen, C. Olsen. *Perugia, Italy:* G.B. Bolli, F. Porcellati, C. Fanelli, M. Romolini, F. Calcinaro, A. Saturni. *Pisa, Italy:* E. Ferrannini, A. Natali, D. Tricò, E. Muscelli, S. Pinnola, M. Kozakova. *Rome, Italy:* G. Mingrone, P. Di Rocco, A. Favuzzi. *Vienna, Austria:* W. Waldhäusl, M. Roden, C. Anderwald, A. Hofer.

**Core laboratories and reading centres:** *Lipids (Dublin, Ireland):* J. Nolan, P. Gaffney. *Hormones (Odense, Denmark):* H. Beck-Nielsen, C. Olsen, L. Hansen. *Albumin:creatinine (Amsterdam, The Netherlands):* J. Dekker, A. Kok; *Genetics (Newcastle-upon-Tyne, UK):* M. Walker. *Stable glucose isotope (Pisa, Italy):* A. Gastaldelli, D. Ciociaro. *Ultrasound reading centre (Pisa, Italy):* E. Ferrannini, M. Kozakova. *ECG reading centre (Amsterdam, The Netherlands):* J. Dekker, G. Nijpels.

**Coordinating office:** *Pisa, Italy,* E. Ferrannini, S.A. Hills, L. Landucci. **Data management:** *Villejuif, France,* B. Balkau, L. Mhamdi. **Mathematical modelling and website management:** *Padova, Italy,* A. Mari, G. Pacini, C. Cavaggion.

Further information on the RISC project and participating centres can be found on <http://www.egir.org>.
